# Supplementary material for: Calcium intake and colon cancer risk subtypes by tumor molecular characteristics
Source: Springer Nature journal article supplement (doi:10.1007/s10552-019-01165-3), 2019-04-08
Supplement: MOESM1 [file 16629330]

**Supplemental Figure 1. Participant flow chart**


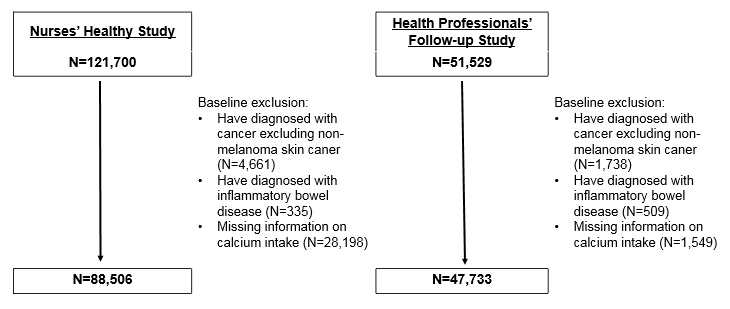


| **Supplemental Table 1. Multivariable HR**1 **and 95% CI of Total Calcium Intake and Colon Cancer Risk Overall and by Molecular Subtypes in Men and Women** | | | | | | | | | | |
| --- | --- | --- | --- | --- | --- | --- | --- | --- | --- | --- |
|  |  | **Total calcium intake (mg/day)** | | | | | | |  |  |
|  |  | **0-599** | **600-799** | **800-999** | **1000-1199** | **≥1200** |  | **Per 300** | ***P*trend2** | ***P*heterogeneity3**  **M;W** |
| **Overall** | |  |  |  |  |  |  |  |  | NR;NR |
|  | No. cases, M;W | 135;272 | 201;332 | 142;231 | 75;189 | 108;158 |  | 661;1182 |  |  |
|  | Men | 1 (ref) | 0.97 (0.77, 1.21) | 0.96 (0.75, 1.24) | 0.86 (0.64, 1.16) | 0.87 (0.66, 1.15) |  | 0.95 (0.89, 1.02) | 0.18 |  |
|  | Women | 1 (ref) | 0.97 (0.82, 1.14) | 0.77 (0.64, 0.92) | 0.88 (0.72, 1.08) | 0.67 (0.54, 0.84) |  | 0.90 (0.85, 0.96) | 0.001 |  |
| **CIMP status** | |  |  |  |  |  |  |  |  | 0.63;0.14 |
|  | **Negative/low** |  |  |  |  |  |  |  |  |  |
|  | No. cases, M;W | 47;90 | 70;116 | 42;84 | 19;52 | 40;44 |  | 218;386 |  |  |
|  | Men | 1 (ref) | 1.09 (0.74, 1.59) | 0.94 (0.61, 1.45) | 0.74 (0.42, 1.28) | 1.02 (0.65, 1.62) |  | 1.01 (0.90, 1.13) | 0.88 |  |
|  | Women | 1 (ref) | 0.99 (0.74, 1.31) | 0.81 (0.60, 1.11) | 0.72 (0.50, 1.04) | 0.58 (0.39, 0.86) |  | 0.87 (0.78, 0.97) | 0.01 |  |
|  | **High** |  |  |  |  |  |  |  |  |  |
|  | No. cases, M;W | 4;26 | 11;40 | 8;33 | 7;26 | 8;26 |  | 38;151 |  |  |
|  | Men | 1 (ref) | 1.58 (0.50, 5.05) | 1.60 (0.47, 5.39) | 2.51 (0.72, 8.79) | 1.83 (0.54, 6.21) |  | 1.08 (0.84, 1.38) | 0.55 |  |
|  | Women | 1 (ref) | 1.14 (0.69, 1.88) | 1.01 (0.59, 1.70) | 1.05 (0.60, 1.84) | 0.97 (0.55, 1.72) |  | 1.00 (0.86, 1.17) | 0.98 |  |
| **MSI status** | |  |  |  |  |  |  |  |  | 0.08;0.74 |
|  | **non-MSI-high** |  |  |  |  |  |  |  |  |  |
|  | No. cases, M;W | 49;87 | 80;125 | 50;84 | 22;54 | 41;49 |  | 242;399 |  |  |
|  | Men | 1 (ref) | 1.13 (0.78, 1.63) | 1.00 (0.66, 1.51) | 0.78 (0.46, 1.31) | 0.98 (0.63, 1.54) |  | 0.98 (0.88, 1.10) | 0.73 |  |
|  | Women | 1 (ref) | 1.12 (0.85, 1.48) | 0.86 (0.63, 1.18) | 0.78 (0.54, 1.12) | 0.68 (0.47, 1.00) |  | 0.90 (0.80, 1.00) | 0.04 |  |
|  | **High** |  |  |  |  |  |  |  |  |  |
|  | No. cases, M;W | 4;27 | 14;33 | 10;33 | 7;24 | 12;19 |  | 47;136 |  |  |
|  | Men | 1 (ref) | 2.36 (0.77, 7.24) | 2.33 (0.72, 7.54) | 3.00 (0.86, 10.4) | 3.71 (1.17, 11.8) |  | 1.22 (0.99, 1.49) | 0.06 |  |
|  | Women | 1 (ref) | 0.87 (0.52, 1.46) | 0.93 (0.55, 1.57) | 0.93 (0.53, 1.64) | 0.65 (0.35, 1.20) |  | 0.92 (0.78, 1.09) | 0.36 |  |
| ***BRAF* mutation** | |  |  |  |  |  |  |  |  | 0.02;0.57 |
|  | **(-)** |  |  |  |  |  |  |  |  |  |
|  | No. cases, M;W | 55;85 | 85;125 | 57;80 | 22;55 | 42;53 |  | 261;398 |  |  |
|  | Men | 1 (ref) | NE | NE | NE | NE |  | 0.95 (0.85, 1.07) | 0.41 |  |
|  | Women | 1 (ref) | 1.13 (0.85, 1.49) | 0.81 (0.59, 1.12) | 0.79 (0.55, 1.13) | 0.72 (0.50, 1.05) |  | 0.89 (0.80, 0.99) | 0.04 |  |
|  | **(+)** |  |  |  |  |  |  |  |  |  |
|  | No. cases, M;W | 0;30 | 10;32 | 4;37 | 7;24 | 10;17 |  | 31;140 |  |  |
|  | Men | 1 (ref) | NE | NE | NE | NE |  | 1.32 (1.05, 1.66) | 0.02 |  |
|  | Women | 1 (ref) | 0.80 (0.48, 1.33) | 1.02 (0.62, 1.68) | 0.90 (0.52, 1.57) | 0.59 (0.32, 1.10) |  | 0.94 (0.80, 1.11) | 0.50 |  |
| ***KRAS* mutation** | |  |  |  |  |  |  |  |  | 0.26;0.90 |
|  | **(-)** |  |  |  |  |  |  |  |  |  |
|  | No. cases, M;W | 29;88 | 53;99 | 39;81 | 18;50 | 33;51 |  | 172;369 |  |  |
|  | Men | 1 (ref) | 1.25 (0.79, 1.99) | 1.30 (0.79, 2.14) | 1.09 (0.59, 2.00) | 1.34 (0.79, 2.28) |  | 1.05 (0.93, 1.19) | 0.41 |  |
|  | Women | 1 (ref) | 0.87 (0.65, 1.17) | 0.79 (0.58, 1.09) | 0.68 (0.47, 0.99) | 0.65 (0.45, 0.96) |  | 0.90 (0.81, 1.01) | 0.07 |  |
|  | **(+)** |  |  |  |  |  |  |  |  |  |
|  | No. cases, M;W | 27;27 | 41;59 | 22;37 | 11;29 | 20;19 |  | 121;171 |  |  |
|  | Men | 1 (ref) | 1.04 (0.64, 1.71) | 0.77 (0.43, 1.39) | 0.67 (0.32, 1.37) | 0.86 (0.47, 1.58) |  | 0.94 (0.80, 1.11) | 0.48 |  |
|  | Women | 1 (ref) | 1.62 (1.02, 2.57) | 1.15 (0.69, 1.91) | 1.27 (0.74, 2.18) | 0.79 (0.43, 1.45) |  | 0.91 (0.78, 1.07) | 0.25 |  |
| ***PIK3CA* mutation** | |  |  |  |  |  |  |  |  | 0.77;0.23 |
|  | **(-)** |  |  |  |  |  |  |  |  |  |
|  | No. cases, M;W | 40;93 | 77;118 | 45;94 | 19;61 | 40;60 |  | 221;426 |  |  |
|  | Men | 1 (ref) | 1.31 (0.88, 1.93) | 1.06 (0.68, 1.66) | 0.80 (0.45, 1.40) | 1.20 (0.75, 1.93) |  | 1.01 (0.90, 1.13) | 0.91 |  |
|  | Women | 1 (ref) | 0.97 (0.73, 1.28) | 0.86 (0.64, 1.17) | 0.78 (0.55, 1.10) | 0.73 (0.51, 1.04) |  | 0.93 (0.84, 1.03) | 0.19 |  |
|  | **(+)** |  |  |  |  |  |  |  |  |  |
|  | No. cases, M;W | 10;12 | 12;28 | 13;14 | 9;14 | 11;5 |  | 55;73 |  |  |
|  | Men | 1 (ref) | 0.77 (0.33, 1.79) | 1.18 (0.51, 2.73) | 1.49 (0.59, 3.75) | 1.14 (0.47, 2.78) |  | 1.04 (0.85, 1.29) | 0.69 |  |
|  | Women | 1 (ref) | 1.62 (0.82, 3.22) | 0.94 (0.43, 2.06) | 1.29 (0.58, 2.83) | 0.43 (0.15, 1.24) |  | 0.80 (0.63, 1.02) | 0.07 |  |
| 1 Multivariable HR was stratified by age (continuous), questionnaire cycle (continuous), and sex (men vs. women); adjusted for Caucasian (yes vs. no), family history of colorectal cancer (yes vs. no), history of sigmoidoscopy/colonoscopy (yes vs. no), regular aspirin use (yes vs. no), smoking (0, 1-9.9, 10+ pack-years), BMI (<25, 25-27.4, 27.5-29.9, 30+ kg/m2), physical activity (<3, 3-26.9, 27+ MET-hours/week), 25-hydroxyvitamin D scores (quintiles), and intakes of energy (quintiles), alcohol (quintiles), red and processed meat (quintiles), and folate (quintiles).  2 The *P* value for linear trend across calcium intake was from the Wald test on the continuous term of calcium intake.  3 The *P* value for heterogeneity across tumor markers was from the likelihood ratio test comparing the model in which a linear association with calcium intake was allowed to vary by tumor subtypes with the model in which a common association was assumed.  Abbreviations: CIMP, CpG island methylator phenotype; M, men; MSI, microsatellite instability; NR, not relevant; W, women | | | | | | | | | | |

| **Supplemental Table 2. Multivariable HR**1 **and 95% CI of Dietary Calcium Intake and Colon Cancer Risk Overall and by Molecular Subtypes in Men and Women** | | | | | | | | | |
| --- | --- | --- | --- | --- | --- | --- | --- | --- | --- |
|  |  | **Dietary calcium intake (mg/day)** | | | | | |  |  |
|  |  | **0-599** | **600-749** | **750-899** | **≥900** |  | **Per 300** | ***P*trend2** | ***P*heterogeneity3**  **M;W** |
| **Overall** | |  |  |  |  |  |  |  | NR;NR |
|  | No. cases, M;W | 173;417 | 181;356 | 148;212 | 159;197 |  | 661;1182 |  |  |
|  | Men | 1 (ref) | 0.92 (0.74,1.14) | 1.00 (0.80,1.27) | 0.80 (0.63,1.00) |  | 0.91 (0.82,1.00) | 0.05 |  |
|  | Women | 1 (ref) | 1.02 (0.88,1.18) | 0.89 (0.75,1.06) | 0.78 (0.65,0.93) |  | 0.88 (0.81,0.96) | 0.003 |  |
| **CIMP status** | |  |  |  |  |  |  |  | 0.12;0.04 |
|  | **Negative/low** |  |  |  |  |  |  |  |  |
|  | No. cases, M;W | 61;137 | 58;115 | 49;85 | 50;49 |  | 218;386 |  |  |
|  | Men | 1 (ref) | 0.93 (0.64, 1.34) | 1.06 (0.71, 1.57) | 0.78 (0.52, 1.16) |  | 0.87 (0.74, 1.03) | 0.10 |  |
|  | Women | 1 (ref) | 1.00 (0.78, 1.29) | 1.08 (0.82, 1.43) | 0.59 (0.42, 0.83) |  | 0.82 (0.71, 0.96) | 0.01 |  |
|  | **High** |  |  |  |  |  |  |  |  |
|  | No. cases, M;W | 5;44 | 15;46 | 5;27 | 13;34 |  | 38;151 |  |  |
|  | Men | 1 (ref) | 2.71 (0.98, 7.54) | 1.04 (0.30, 3.63) | 2.07 (0.73, 5.90) |  | 1.18 (0.84, 1.66) | 0.34 |  |
|  | Women | 1 (ref) | 1.19 (0.78, 1.81) | 1.03 (0.63, 1.67) | 1.22 (0.77, 1.94) |  | 1.08 (0.87, 1.34) | 0.48 |  |
| **MSI status** | |  |  |  |  |  |  |  | 0.01;0.34 |
|  | **non-MSI-high** |  |  |  |  |  |  |  |  |
|  | No. cases, M;W | 65;135 | 73;126 | 48;82 | 56;56 |  | 242;399 |  |  |
|  | Men | 1 (ref) | 1.04 (0.74, 1.47) | 0.90 (0.61, 1.33) | 0.79 (0.54, 1.15) |  | 0.85 (0.72, 0.99) | 0.04 |  |
|  | Women | 1 (ref) | 1.12 (0.87, 1.43) | 1.07 (0.80, 1.42) | 0.68 (0.49, 0.95) |  | 0.86 (0.75, 1.00) | 0.04 |  |
|  | **High** |  |  |  |  |  |  |  |  |
|  | No. cases, M;W | 6;44 | 14;37 | 9;28 | 18;27 |  | 47;136 |  |  |
|  | Men | 1 (ref) | 2.20 (0.84, 5.76) | 1.72 (0.60, 4.88) | 2.65 (1.04, 6.77) |  | 1.32 (0.99, 1.77) | 0.06 |  |
|  | Women | 1 (ref) | 0.94 (0.60, 1.46) | 1.05 (0.65, 1.70) | 0.96 (0.59, 1.57) |  | 0.98 (0.78, 1.24) | 0.87 |  |
| ***BRAF* mutation** | |  |  |  |  |  |  |  | 0.02;0.54 |
|  | **(-)** |  |  |  |  |  |  |  |  |
|  | No. cases, M;W | 69;134 | 76;123 | 55;81 | 61;60 |  | 261;398 |  |  |
|  | Men | 1 (ref) | 1.03 (0.74, 1.45) | 0.98 (0.68, 1.42) | 0.81 (0.56, 1.17) |  | 0.87 (0.74, 1.01) | 0.07 |  |
|  | Women | 1 (ref) | 1.08 (0.84, 1.39) | 1.04 (0.78, 1.39) | 0.73 (0.53, 1.00) |  | 0.87 (0.75, 1.00) | 0.06 |  |
|  | **(+)** |  |  |  |  |  |  |  |  |
|  | No. cases, M;W | 3;47 | 11;41 | 4;27 | 13;25 |  | 31;140 |  |  |
|  | Men | 1 (ref) | 3.09 (0.85, 11.1) | 1.41 (0.31, 6.34) | 3.65 (1.03, 13.0) |  | 1.39 (0.98, 1.96) | 0.07 |  |
|  | Women | 1 (ref) | 1.01 (0.66, 1.54) | 0.98 (0.61, 1.59) | 0.85 (0.52, 1.40) |  | 0.94 (0.75, 1.19) | 0.63 |  |
| ***KRAS* mutation** | |  |  |  |  |  |  |  | 0.10;0.22 |
|  | **(-)** |  |  |  |  |  |  |  |  |
|  | No. cases, M;W | 39;132 | 46;107 | 39;74 | 48;56 |  | 172;369 |  |  |
|  | Men | 1 (ref) | 1.07 (0.69, 1.66) | 1.20 (0.76, 1.89) | 1.12 (0.72, 1.75) |  | 1.00 (0.84, 1.19) | 0.97 |  |
|  | Women | 1 (ref) | 0.95 (0.73, 1.24) | 0.97 (0.72, 1.30) | 0.68 (0.49, 0.95) |  | 0.85 (0.73, 0.99) | 0.03 |  |
|  | **(+)** |  |  |  |  |  |  |  |  |
|  | No. cases, M;W | 35;49 | 40;57 | 20;35 | 26;30 |  | 121;171 |  |  |
|  | Men | 1 (ref) | 1.08 (0.68, 1.71) | 0.69 (0.39, 1.22) | 0.67 (0.39, 1.13) |  | 0.79 (0.63, 1.00) | 0.05 |  |
|  | Women | 1 (ref) | 1.36 (0.93, 2.01) | 1.23 (0.79, 1.91) | 1.00 (0.63, 1.59) |  | 0.99 (0.80, 1.21) | 0.90 |  |
| ***PIK3CA* mutation** | |  |  |  |  |  |  |  | 0.40;0.73 |
|  | **(-)** |  |  |  |  |  |  |  |  |
|  | No. cases, M;W | 57;145 | 65;130 | 47;87 | 52;64 |  | 221;426 |  |  |
|  | Men | 1 (ref) | 1.06 (0.74, 1.53) | 0.97 (0.65, 1.46) | 0.82 (0.55, 1.22) |  | 0.89 (0.76, 1.05) | 0.17 |  |
|  | Women | 1 (ref) | 1.06 (0.83, 1.35) | 1.04 (0.79, 1.37) | 0.73 (0.53, 0.99) |  | 0.90 (0.78, 1.04) | 0.15 |  |
|  | **(+)** |  |  |  |  |  |  |  |  |
|  | No. cases, M;W | 10;20 | 19;23 | 7;15 | 19;15 |  | 55;73 |  |  |
|  | Men | 1 (ref) | 1.63 (0.75, 3.53) | 0.82 (0.31, 2.18) | 1.66 (0.76, 3.65) |  | 1.03 (0.76, 1.39) | 0.84 |  |
|  | Women | 1 (ref) | 1.30 (0.71, 2.37) | 1.30 (0.66, 2.56) | 1.22 (0.62, 2.41) |  | 0.96 (0.70, 1.32) | 0.80 |  |
| 1 Multivariable HR was adjusted for supplemental calcium intake (<200, 200-299, 300-499, ≥500 mg/day) in addition to the same set of variables as denoted in Supplemental Table 1.  2 The *P* value for linear trend across calcium intake was from the Wald test on the continuous term of calcium intake.  3 The *P* value for heterogeneity across tumor markers was from the likelihood ratio test comparing the model in which a linear association with calcium intake was allowed to vary by tumor subtypes with the model in which a common association was assumed.  Abbreviations: CIMP, CpG island methylator phenotype; M, men; MSI, microsatellite instability; NR, not relevant; W, women | | | | | | | | | |

| **Supplemental Table 3. HR and 95% CI of Dairy Calcium Intake and Colon Cancer Risk Overall and by Molecular Subtypes** | | | | | | | | | | |
| --- | --- | --- | --- | --- | --- | --- | --- | --- | --- | --- |
|  |  | **Dairy calcium intake (mg/day)** | | | | | |  |  |
|  |  | **0-299** | **300-499** | **500-699** | **≥700** |  | **Per 300** | ***P*trend1** | ***P*heterogeneity2** |
| **Overall** | |  |  |  |  |  |  |  | NR |
|  | No. cases | 610 | 696 | 317 | 220 |  | 1843 |  |  |
|  | Age-adjusted3 | 1 (ref) | 0.93 (0.83, 1.04) | 0.78 (0.68, 0.89) | 0.73 (0.63,0.86) |  | 0.87 (0.82,0.92) | <0.001 |  |
|  | Multivariable4 | 1 (ref) | 0.96 (0.86, 1.08) | 0.83 (0.72, 0.95) | 0.79 (0.67,0.92) |  | 0.89 (0.84,0.95) | 0.001 |  |
| **CIMP status** | |  |  |  |  |  |  |  | 0.009 |
|  | **Negative/low** |  |  |  |  |  |  |  |  |
|  | No. cases | 205 | 235 | 109 | 55 |  | 604 |  |  |
|  | Age-adjusted3 | 1 (ref) | 0.97 (0.80, 1.17) | 0.81 (0.64, 1.02) | 0.55 (0.41, 0.74) |  | 0.80 (0.72, 0.89) | <0.001 |  |
|  | Multivariable4 | 1 (ref) | 0.99 (0.82, 1.20) | 0.86 (0.68, 1.10) | 0.59 (0.44, 0.80) |  | 0.83 (0.74, 0.93) | 0.001 |  |
|  | **High** |  |  |  |  |  |  |  |  |
|  | No. cases | 45 | 80 | 34 | 30 |  | 189 |  |  |
|  | Age-adjusted3 | 1 (ref) | 1.37 (0.95, 1.97) | 1.06 (0.68, 1.65) | 1.37 (0.86, 2.18) |  | 1.06 (0.89, 1.27) | 0.52 |  |
|  | Multivariable4 | 1 (ref) | 1.42 (0.98, 2.05) | 1.14 (0.72, 1.78) | 1.49 (0.93, 2.38) |  | 1.10 (0.92, 1.33) | 0.29 |  |
| **MSI status** | |  |  |  |  |  |  |  | 0.01 |
|  | **non-MSI-high** |  |  |  |  |  |  |  |  |
|  | No. cases | 206 | 255 | 121 | 59 |  | 641 |  |  |
|  | Age-adjusted3 | 1 (ref) | 1.03 (0.85, 1.23) | 0.89 (0.71, 1.11) | 0.58 (0.43, 0.77) |  | 0.81 (0.73, 0.90) | <0.001 |  |
|  | Multivariable4 | 1 (ref) | 1.06 (0.88, 1.27) | 0.96 (0.76, 1.21) | 0.63 (0.47, 0.84) |  | 0.84 (0.75, 0.93) | 0.001 |  |
|  | **High** |  |  |  |  |  |  |  |  |
|  | No. cases | 51 | 71 | 30 | 31 |  | 183 |  |  |
|  | Age-adjusted3 | 1 (ref) | 1.08 (0.75, 1.55) | 0.82 (0.52, 1.29) | 1.25 (0.80, 1.96) |  | 1.07 (0.89, 1.28) | 0.47 |  |
|  | Multivariable4 | 1 (ref) | 1.11 (0.77, 1.60) | 0.88 (0.56, 1.39) | 1.36 (0.86, 2.14) |  | 1.11 (0.92, 1.33) | 0.27 |  |
| ***BRAF* mutation** | |  |  |  |  |  |  |  | 0.09 |
|  | **(-)** |  |  |  |  |  |  |  |  |
|  | No. cases | 213 | 257 | 124 | 65 |  | 659 |  |  |
|  | Age-adjusted3 | 1 (ref) | 1.00 (0.83, 1.20) | 0.87 (0.70, 1.09) | 0.61 (0.46, 0.81) |  | 0.83 (0.75, 0.92) | <0.001 |  |
|  | Multivariable4 | 1 (ref) | 1.03 (0.85, 1.24) | 0.94 (0.74, 1.17) | 0.66 (0.50, 0.88) |  | 0.86 (0.77, 0.95) | 0.004 |  |
|  | **(+)** |  |  |  |  |  |  |  |  |
|  | No. cases | 47 | 71 | 29 | 24 |  | 171 |  |  |
|  | Age-adjusted3 | 1 (ref) | 1.17 (0.81, 1.69) | 0.88 (0.55, 1.40) | 1.08 (0.66, 1.77) |  | 1.00 (0.82, 1.21) | 0.98 |  |
|  | Multivariable4 | 1 (ref) | 1.21 (0.83, 1.75) | 0.95 (0.59, 1.51) | 1.18 (0.71, 1.94) |  | 1.04 (0.85, 1.26) | 0.72 |  |
| ***KRAS* mutation** | |  |  |  |  |  |  |  | 0.84 |
|  | **(-)** |  |  |  |  |  |  |  |  |
|  | No. cases | 167 | 218 | 99 | 57 |  | 541 |  |  |
|  | Age-adjusted3 | 1 (ref) | 1.06 (0.86, 1.30) | 0.88 (0.68, 1.13) | 0.69 (0.51, 0.94) |  | 0.86 (0.77, 0.97) | 0.01 |  |
|  | Multivariable4 | 1 (ref) | 1.09 (0.89, 1.34) | 0.94 (0.73, 1.21) | 0.75 (0.55, 1.02) |  | 0.89 (0.80, 1.00) | 0.06 |  |
|  | **(+)** |  |  |  |  |  |  |  |  |
|  | No. cases | 94 | 111 | 54 | 33 |  | 292 |  |  |
|  | Age-adjusted3 | 1 (ref) | 0.98 (0.74, 1.29) | 0.86 (0.61, 1.20) | 0.71 (0.47, 1.05) |  | 0.85 (0.73, 0.99) | 0.03 |  |
|  | Multivariable4 | 1 (ref) | 1.00 (0.76, 1.33) | 0.92 (0.66, 1.30) | 0.76 (0.51, 1.14) |  | 0.88 (0.75, 1.02) | 0.10 |  |
| ***PIK3CA* mutation** | |  |  |  |  |  |  |  | 0.63 |
|  | **(-)** |  |  |  |  |  |  |  |  |
|  | No. cases | 205 | 259 | 113 | 70 |  | 647 |  |  |
|  | Age-adjusted3 | 1 (ref) | 1.03 (0.85, 1.23) | 0.81 (0.64, 1.02) | 0.69 (0.53, 0.91) |  | 0.86 (0.77, 0.95) | 0.003 |  |
|  | Multivariable4 | 1 (ref) | 1.06 (0.88, 1.28) | 0.87 (0.69, 1.11) | 0.76 (0.57, 1.00) |  | 0.89 (0.80, 0.99) | 0.03 |  |
|  | **(+)** |  |  |  |  |  |  |  |  |
|  | No. cases | 39 | 44 | 27 | 18 |  | 128 |  |  |
|  | Age-adjusted3 | 1 (ref) | 0.90 (0.58, 1.39) | 1.05 (0.64, 1.71) | 0.91 (0.52, 1.60) |  | 0.92 (0.73, 1.15) | 0.44 |  |
|  | Multivariable4 | 1 (ref) | 0.94 (0.61, 1.45) | 1.14 (0.69, 1.88) | 0.98 (0.55, 1.73) |  | 0.95 (0.76, 1.18) | 0.63 |  |
| 1 The *P* value for linear trend across calcium intake was from the Wald test on the continuous term of calcium intake.  2 The *P* value for heterogeneity across tumor markers was from the likelihood ratio test comparing the model in which a linear association with calcium intake was allowed to vary by tumor subtypes with the model in which a common association was assumed.  3 Age-adjusted analysis was stratified by age (continuous), questionnaire cycle (continuous), and sex (men vs. women).  4 Multivariable analysis was adjusted for supplemental calcium intake (<200, 200-299, 300-499, ≥500 mg/day) in addition to the same set of variables as denoted in Supplemental Table 1.  Abbreviations: CIMP, CpG island methylator phenotype; MSI, microsatellite instability; NR, not relevant | | | | | | | | | | |

| **Supplemental Table 4. Multivariable HR**1 **and 95% CI of Dairy Calcium Intake and Colon Cancer Risk by CIMP and MSI status** | | | | | |
| --- | --- | --- | --- | --- | --- |
|  | **CIMP and MSI status** | | | |  |
| **Dairy calcium** | **CIMP-negative/low;**  **non-MSI-high** | **CIMP-negative/low;**  **MSI-high** | **CIMP-high;**  **non-MSI-high** | **CIMP-high;**  **MSI-high** | ***P*heterogeneity2** |
| No. cases | 544 | 38 | 50 | 136 |  |
| Per 300 mg/day | 0.84 (0.75, 0.94) | 0.84 (0.55, 1.29) | 0.90 (0.62, 1.31) | 1.18 (0.96, 1.46) | 0.05 |
| *P*trend3 | 0.003 | 0.43 | 0.59 | 0.12 |  |
| 1 Multivariable HR was adjusted for supplemental calcium intake (<200, 200-299, 300-499, ≥500 mg/day) in addition to the same set of variables as denoted in Supplemental Table 1.  2 The *P* value for heterogeneity across tumor markers was from the likelihood ratio test comparing the model in which a linear association with calcium intake was allowed to vary by tumor subtypes with the model in which a common association was assumed.  3 The *P* value for linear trend across calcium intake was from the Wald test on the continuous term of calcium intake.  Abbreviations: CIMP, CpG island methylator phenotype; MSI, microsatellite instability | | | | | |

| **Supplemental Table 5. Multivariable HR**1 **and 95% CI of Dairy Calcium Intake and Colon Cancer Risk Overall and by Molecular Subtypes in Men and Women** | | | | | | | | | |
| --- | --- | --- | --- | --- | --- | --- | --- | --- | --- |
|  |  | **Dairy calcium intake (mg/day)** | | | | | |  |  | |
|  |  | **0-299** | **300-499** | **500-699** | **≥700** |  | **Per 300** | ***P*trend2** | ***P*heterogeneity3**  **M;W** | |
| **Overall** | |  |  |  |  |  |  |  | NR;NR | |
|  | No. cases, M;W | 220;390 | 232;464 | 112;205 | 97;123 |  | 661;1182 |  |  | |
|  | Men | 1 (ref) | 0.96 (0.79, 1.15) | 0.91 (0.72, 1.15) | 0.83 (0.64, 1.06) |  | 0.92 (0.84, 1.01) | 0.08 |  | |
|  | Women | 1 (ref) | 0.96 (0.84, 1.11) | 0.78 (0.66, 0.93) | 0.76 (0.61, 0.93) |  | 0.87 (0.80, 0.95) | 0.002 |  | |
| **CIMP status** | |  |  |  |  |  |  |  | 0.11;0.04 | |
|  | **Negative/low** |  |  |  |  |  |  |  |  | |
|  | No. cases, M;W | 80;125 | 74;161 | 35;74 | 29;26 |  | 218;386 |  |  | |
|  | Men | 1 (ref) | 0.88 (0.64, 1.22) | 0.83 (0.55, 1.26) | 0.69 (0.44, 1.07) |  | 0.86 (0.73, 1.01) | 0.07 |  | |
|  | Women | 1 (ref) | 1.05 (0.83, 1.33) | 0.88 (0.65, 1.18) | 0.51 (0.33, 0.78) |  | 0.80 (0.69, 0.94) | 0.005 |  | |
|  | **High** |  |  |  |  |  |  |  |  | |
|  | No. cases, M;W | 7;38 | 15;65 | 6;28 | 10;20 |  | 38;151 |  |  | |
|  | Men | 1 (ref) | 1.94 (0.78, 4.79) | 1.44 (0.48, 4.33) | 2.45 (0.92, 6.53) |  | 1.17 (0.84, 1.64) | 0.36 |  | |
|  | Women | 1 (ref) | 1.31 (0.87, 1.97) | 1.06 (0.65, 1.74) | 1.23 (0.71, 2.13) |  | 1.06 (0.85, 1.32) | 0.60 |  | |
| **MSI status** | |  |  |  |  |  |  |  | 0.01;0.25 | |
|  | **non-MSI-high** |  |  |  |  |  |  |  |  | |
|  | No. cases, M;W | 83;123 | 87;168 | 43;78 | 29;30 |  | 242;399 |  |  | |
|  | Men | 1 (ref) | 0.97 (0.71, 1.32) | 0.97 (0.66, 1.41) | 0.66 (0.43, 1.02) |  | 0.84 (0.71, 0.98) | 0.03 |  | |
|  | Women | 1 (ref) | 1.11 (0.88, 1.41) | 0.95 (0.71, 1.27) | 0.59 (0.39, 0.89) |  | 0.84 (0.72, 0.97) | 0.02 |  | |
|  | **High** |  |  |  |  |  |  |  |  | |
|  | No. cases, M;W | 11;40 | 16;55 | 6;24 | 14;17 |  | 47;136 |  |  | |
|  | Men | 1 (ref) | 1.33 (0.61, 2.90) | 0.90 (0.33, 2.46) | 2.40 (1.07, 5.35) |  | 1.32 (1.00, 1.76) | 0.05 |  | |
|  | Women | 1 (ref) | 1.05 (0.69, 1.58) | 0.85 (0.51, 1.42) | 0.99 (0.55, 1.76) |  | 0.99 (0.78, 1.25) | 0.90 |  | |
| ***BRAF* mutation** | |  |  |  |  |  |  |  | 0.03;0.57 | |
|  | **(-)** |  |  |  |  |  |  |  |  | |
|  | No. cases, M;W | 89;124 | 94;163 | 45;79 | 33;32 |  | 261;398 |  |  | |
|  | Men | 1 (ref) | 0.97 (0.72, 1.31) | 0.92 (0.63, 1.33) | 0.70 (0.46, 1.06) |  | 0.86 (0.74, 1.00) | 0.05 |  | |
|  | Women | 1 (ref) | 1.06 (0.84, 1.35) | 0.94 (0.70, 1.25) | 0.62 (0.41, 0.92) |  | 0.85 (0.73, 0.99) | 0.03 |  | |
|  | **(+)** |  |  |  |  |  |  |  |  | |
|  | No. cases, M;W | 6;41 | 11;60 | 4;25 | 10;14 |  | 31;140 |  |  | |
|  | Men | 1 (ref) | 1.62 (0.59, 4.39) | 1.24 (0.34, 4.43) | 2.99 (1.08, 8.32) |  | 1.34 (0.95, 1.88) | 0.10 |  | |
|  | Women | 1 (ref) | 1.14 (0.76, 1.70) | 0.88 (0.53, 1.46) | 0.81 (0.44, 1.50) |  | 0.92 (0.73, 1.17) | 0.51 |  | |
| ***KRAS* mutation** | |  |  |  |  |  |  |  | 0.10;0.21 | |
|  | **(-)** |  |  |  |  |  |  |  |  | |
|  | No. cases, M;W | 49;118 | 60;158 | 35;64 | 28;29 |  | 172;369 |  |  | |
|  | Men | 1 (ref) | 1.14 (0.77, 1.67) | 1.33 (0.85, 2.07) | 1.09 (0.68, 1.76) |  | 0.99 (0.83, 1.18) | 0.91 |  | |
|  | Women | 1 (ref) | 1.06 (0.83, 1.36) | 0.79 (0.58, 1.08) | 0.58 (0.38, 0.88) |  | 0.83 (0.71, 0.97) | 0.02 |  | |
|  | **(+)** |  |  |  |  |  |  |  |  | |
|  | No. cases, M;W | 47;47 | 45;66 | 14;40 | 15;18 |  | 121;171 |  |  | |
|  | Men | 1 (ref) | 0.86 (0.57, 1.31) | 0.53 (0.29, 0.97) | 0.59 (0.32, 1.07) |  | 0.78 (0.62, 0.99) | 0.04 |  | |
|  | Women | 1 (ref) | 1.14 (0.78, 1.66) | 1.26 (0.82, 1.93) | 0.94 (0.54, 1.64) |  | 0.97 (0.79, 1.20) | 0.81 |  | |
| ***PIK3CA* mutation** | |  |  |  |  |  |  |  | 0.71;0.71 | |
|  | **(-)** |  |  |  |  |  |  |  |  | |
|  | No. cases, M;W | 72;133 | 83;176 | 33;80 | 33;37 |  | 221;426 |  |  | |
|  | Men | 1 (ref) | 1.05 (0.76, 1.45) | 0.82 (0.53, 1.25) | 0.86 (0.56, 1.32) |  | 0.90 (0.76, 1.06) | 0.19 |  | |
|  | Women | 1 (ref) | 1.06 (0.84, 1.33) | 0.88 (0.66, 1.18) | 0.68 (0.46, 0.99) |  | 0.88 (0.76, 1.02) | 0.08 |  | |
|  | **(+)** |  |  |  |  |  |  |  |  | |
|  | No. cases, M;W | 18;21 | 15;29 | 13;14 | 9;9 |  | 55;73 |  |  | |
|  | Men | 1 (ref) | 0.75 (0.37, 1.50) | 1.34 (0.65, 2.76) | 0.92 (0.41, 2.10) |  | 0.96 (0.70, 1.31) | 0.79 |  | |
|  | Women | 1 (ref) | 1.08 (0.62, 1.91) | 1.00 (0.51, 1.98) | 1.04 (0.47, 2.30) |  | 0.94 (0.68, 1.31) | 0.73 |  | |
| 1 Multivariable HR was adjusted for supplemental calcium intake (<200, 200-299, 300-499, ≥500 mg/day) in addition to the same set of variables as denoted in Supplemental Table 1.  2 The *P* value for linear trend across calcium intake was from the Wald test on the continuous term of calcium intake.  3 The *P* value for heterogeneity across tumor markers was from the likelihood ratio test comparing the model in which a linear association with calcium intake was allowed to vary by tumor subtypes with the model in which a common association was assumed.  Abbreviations: CIMP, CpG island methylator phenotype; M, men; MSI, microsatellite instability; NR, not relevant; W, women | | | | | | | | | |

| **Supplemental Table 6. Multivariable HR1 and 95% CI of Supplemental Calcium Intake and Colon Cancer Risk Overall and by Molecular Subtypes in Men and Women** | | | | | | | | | |
| --- | --- | --- | --- | --- | --- | --- | --- | --- | --- |
|  |  | **Supplemental calcium intake (mg/day)** | | | | | |  |  | |
|  |  | **0-199** | **200-299** | **300-499** | **≥500** |  | **Per 300** | ***P*trend2** | ***P*heterogeneity2**  **M;W** | |
| **Overall** | |  |  |  |  |  |  |  | NR;NR | |
|  | No. cases, M;W | 554;862 | 29;102 | 36;120 | 42;98 |  | 661;1182 |  |  | |
|  | Men | 1 (ref) | 1.01(0.69,1.48) | 1.21(0.86,1.72) | 0.93(0.67,1.29) |  | 1.01(0.92,1.12) | 0.80 |  | |
|  | Women | 1 (ref) | 0.89(0.72,1.10) | 0.83(0.68,1.02) | 0.84(0.67,1.04) |  | 0.91(0.83,1.00) | 0.06 |  | |
| **CIMP status** | |  |  |  |  |  |  |  | 0.41;0.67 | |
|  | **Negative/low** |  |  |  |  |  |  |  |  | |
|  | No. cases, M;W | 178;286 | 11;31 | 9;38 | 20;31 |  | 218;386 |  |  | |
|  | Men | 1 (ref) | NE | NE | NE |  | 1.15 (0.99, 1.33) | 0.07 |  | |
|  | Women | 1 (ref) | 0.83 (0.57, 1.21) | 0.81 (0.57, 1.15) | 0.86 (0.58, 1.26) |  | 0.91 (0.77, 1.07) | 0.27 |  | |
|  | **High** |  |  |  |  |  |  |  |  | |
|  | No. cases, M;W | 32;105 | 0;12 | 4;20 | 2;14 |  | 38;151 |  |  | |
|  | Men | 1 (ref) | NE | NE | NE |  | 0.97 (0.64, 1.47) | 0.87 |  | |
|  | Women | 1 (ref) | 0.75 (0.41, 1.37) | 0.97 (0.59, 1.58) | 0.85 (0.48, 1.50) |  | 0.97 (0.77, 1.22) | 0.78 |  | |
| **MSI status** | |  |  |  |  |  |  |  | 0.96;0.82 | |
|  | **non-MSI-high** |  |  |  |  |  |  |  |  | |
|  | No. cases, M;W | 199;294 | 8;33 | 14;42 | 21;30 |  | 242;399 |  |  | |
|  | Men | 1 (ref) | 0.86 (0.42, 1.75) | 1.53 (0.87, 2.67) | 1.31 (0.82, 2.11) |  | 1.12 (0.97, 1.30) | 0.12 |  | |
|  | Women | 1 (ref) | 0.86 (0.59, 1.24) | 0.88 (0.63, 1.24) | 0.80 (0.54, 1.18) |  | 0.92 (0.79, 1.08) | 0.32 |  | |
|  | **High** |  |  |  |  |  |  |  |  | |
|  | No. cases, M;W | 39;98 | 2;9 | 3;17 | 3;12 |  | 47;136 |  |  | |
|  | Men | 1 (ref) | 1.08 (0.26, 4.53) | 1.76 (0.54, 5.80) | 1.09 (0.33, 3.58) |  | 1.11 (0.79, 1.57) | 0.53 |  | |
|  | Women | 1 (ref) | 0.60 (0.30, 1.20) | 0.86 (0.51, 1.46) | 0.76 (0.41, 1.41) |  | 0.89 (0.69, 1.15) | 0.37 |  | |
| ***BRAF* mutation** | |  |  |  |  |  |  |  | 0.27;0.38 | |
|  | **(-)** |  |  |  |  |  |  |  |  | |
|  | No. cases, M;W | 218;292 | 11;31 | 13;46 | 19;29 |  | 261;398 |  |  | |
|  | Men | 1 (ref) | NE | NE | NE |  | 1.06 (0.91, 1.23) | 0.47 |  | |
|  | Women | 1 (ref) | 0.80 (0.55, 1.16) | 0.94 (0.68, 1.30) | 0.76 (0.51, 1.13) |  | 0.89 (0.76, 1.05) | 0.18 |  | |
|  | **(+)** |  |  |  |  |  |  |  |  | |
|  | No. cases, M;W | 24;100 | 0;12 | 3;14 | 4;14 |  | 31;140 |  |  | |
|  | Men | 1 (ref) | NE | NE | NE |  | 1.30 (0.95, 1.79) | 0.11 |  | |
|  | Women | 1 (ref) | 0.83 (0.45, 1.52) | 0.76 (0.43, 1.34) | 0.95 (0.53, 1.70) |  | 1.01 (0.80, 1.29) | 0.91 |  | |
| ***KRAS* mutation** | |  |  |  |  |  |  |  | 0.83;0.16 | |
|  | **(-)** |  |  |  |  |  |  |  |  | |
|  | No. cases, M;W | 144;266 | 5;25 | 9;45 | 14;33 |  | 172;369 |  |  | |
|  | Men | 1 (ref) | 0.72 (0.29, 1.76) | 1.38 (0.69, 2.74) | 1.20 (0.68, 2.13) |  | 1.10 (0.92, 1.31) | 0.30 |  | |
|  | Women | 1 (ref) | 0.69 (0.46, 1.05) | 1.00 (0.72, 1.39) | 0.91 (0.62, 1.34) |  | 0.98 (0.84, 1.15) | 0.81 |  | |
|  | **(+)** |  |  |  |  |  |  |  |  | |
|  | No. cases, M;W | 98;128 | 6;18 | 7;15 | 10;10 |  | 121;171 |  |  | |
|  | Men | 1 (ref) | 1.32 (0.57, 3.05) | 1.47 (0.67, 3.24) | 1.31 (0.67, 2.56) |  | 1.13 (0.92, 1.38) | 0.24 |  | |
|  | Women | 1 (ref) | 1.04 (0.63, 1.71) | 0.67 (0.39, 1.15) | 0.59 (0.30, 1.13) |  | 0.80 (0.62, 1.03) | 0.09 |  | |
| ***PIK3CA* mutation** | |  |  |  |  |  |  |  | 0.74;0.02 | |
|  | **(-)** |  |  |  |  |  |  |  |  | |
|  | No. cases, M;W | 184;305 | 9;34 | 8;49 | 20;38 |  | 221;426 |  |  | |
|  | Men | 1 (ref) | 1.05 (0.53, 2.08) | 0.92 (0.45, 1.90) | 1.45 (0.89, 2.36) |  | 1.13 (0.97, 1.33) | 0.12 |  | |
|  | Women | 1 (ref) | 0.80 (0.56, 1.15) | 0.92 (0.67, 1.26) | 0.91 (0.64, 1.30) |  | 0.97 (0.83, 1.12) | 0.66 |  | |
|  | **(+)** |  |  |  |  |  |  |  |  | |
|  | No. cases, M;W | 43;59 | 2;5 | 7;8 | 3;1 |  | 55;73 |  |  | |
|  | Men | 1 (ref) | 0.94 (0.22, 3.94) | 3.67 (1.61, 8.37) | 0.74 (0.23, 2.44) |  | 1.07 (0.80, 1.43) | 0.64 |  | |
|  | Women | 1 (ref) | 0.59 (0.23, 1.48) | 0.72 (0.34, 1.53) | 0.12 (0.02, 0.86) |  | 0.58 (0.37, 0.91) | 0.02 |  | |
| 1 Multivariable HR was adjusted for dietary calcium intake (<200, 200-299, 300-499, ≥500 mg/day) in addition to the same set of variables as denoted in Supplemental Table 1.  2 The *P* value for linear trend across calcium intake was from the Wald test on the continuous term of calcium intake.  3 The *P* value for heterogeneity across tumor markers was from the likelihood ratio test comparing the model in which a linear association with calcium intake was allowed to vary by tumor subtypes with the model in which a common association was assumed.  Abbreviations: CIMP, CpG island methylator phenotype; M, men; MSI, microsatellite instability; NE, not estimated because having 0 case of colon cancer subtype in one category of supplemental calcium intake precludes estimation of HR(95% CI) of all exposure categories for the subtype and its counterpart; NR, not relevant; W, women | | | | | | | | | |

| **Supplemental Table 7. HR and 95% CI of Total Calcium Intake and Colorectal Cancer Risk Overall and by Molecular Subtypes** | | | | | | | | | | | | |
| --- | --- | --- | --- | --- | --- | --- | --- | --- | --- | --- | --- | --- |
|  |  |  | **Total calcium intake (mg/day)** | | | | | | |  | | |
|  |  | **0-599** | **600-799** | **800-999** | **1000-1199** | **≥1200** |  | **Per 300** | ***P*trend1** | | ***P*heterogeneity2** | |
| **Overall** | |  |  |  |  |  |  |  |  | | NR | |
|  | Cases, n | 535 | 663 | 466 | 334 | 343 |  | 2341 |  | |  | |
|  | Age-adjusted3 | 1 (ref) | 0.88 (0.79,0.99) | 0.74 (0.65,0.84) | 0.77 (0.67,0.88) | 0.63 (0.55,0.73) |  | 0.88 (0.85,0.92) | <0.001 | |  | |
|  | Multivariable4 | 1 (ref) | 0.93 (0.83,1.05) | 0.82 (0.72,0.94) | 0.89 (0.77,1.03) | 0.77 (0.67,0.90) |  | 0.94 (0.90,0.98) | 0.002 | |  | |
| **CIMP status** | |  |  |  |  |  |  |  |  | | 0.13 | |
|  | **Negative/low** |  |  |  |  |  |  |  |  | |  | |
|  | Cases, n | 203 | 237 | 165 | 100 | 115 |  | 820 |  | |  | |
|  | Age-adjusted3 | 1 (ref) | 0.87 (0.72, 1.06) | 0.73 (0.59, 0.90) | 0.67 (0.53, 0.85) | 0.62 (0.49, 0.78) |  | 0.88 (0.82, 0.94) | <0.001 | |  | |
|  | Multivariable4 | 1 (ref) | 0.91 (0.75, 1.10) | 0.80 (0.64, 0.99) | 0.75 (0.58, 0.97) | 0.74 (0.57, 0.95) |  | 0.93 (0.87, 1.00) | 0.05 | |  | |
|  | **High** |  |  |  |  |  |  |  |  | |  | |
|  | Cases, n | 31 | 52 | 42 | 35 | 34 |  | 194 |  | |  | |
|  | Age-adjusted3 | 1 (ref) | 1.16 (0.74, 1.82) | 1.03 (0.65, 1.65) | 1.18 (0.72, 1.92) | 0.94 (0.58, 1.55) |  | 0.98 (0.86, 1.11) | 0.71 | |  | |
|  | Multivariable4 | 1 (ref) | 1.20 (0.77, 1.89) | 1.13 (0.70, 1.81) | 1.34 (0.81, 2.19) | 1.14 (0.69, 1.89) |  | 1.04 (0.91, 1.18) | 0.56 | |  | |
| **MSI status** | |  |  |  |  |  |  |  |  | | 0.15 | |
|  | **non-MSI-high** |  |  |  |  |  |  |  |  | |  | |
|  | Cases, n | 202 | 257 | 173 | 110 | 120 |  | 862 |  | |  | |
|  | Age-adjusted3 | 1 (ref) | 0.93 (0.77, 1.12) | 0.75 (0.61, 0.92) | 0.72 (0.57, 0.91) | 0.63 (0.50, 0.79) |  | 0.88 (0.83, 0.94) | <0.001 | |  | |
|  | Multivariable4 | 1 (ref) | 0.97 (0.80, 1.17) | 0.83 (0.67, 1.02) | 0.82 (0.64, 1.04) | 0.76 (0.59, 0.97) |  | 0.94 (0.87, 1.00) | 0.05 | |  | |
|  | **High** |  |  |  |  |  |  |  |  | |  | |
|  | Cases, n | 32 | 48 | 44 | 32 | 33 |  | 189 |  | |  | |
|  | Age-adjusted3 | 1 (ref) | 1.03 (0.65, 1.61) | 1.04 (0.66, 1.65) | 1.08 (0.66, 1.78) | 0.89 (0.54, 1.46) |  | 0.97 (0.85, 1.10) | 0.65 | |  | |
|  | Multivariable4 | 1 (ref) | 1.08 (0.68, 1.69) | 1.14 (0.72, 1.82) | 1.24 (0.75, 2.06) | 1.10 (0.66, 1.81) |  | 1.04 (0.91, 1.18) | 0.57 | |  | |
| ***BRAF* mutation** | |  |  |  |  |  |  |  |  | | 0.05 | |
|  | **(-)** |  |  |  |  |  |  |  |  | |  | |
|  | Cases, n | 208 | 265 | 178 | 112 | 128 |  | 891 |  | |  | |
|  | Age-adjusted3 | 1 (ref) | 0.92 (0.77, 1.11) | 0.74 (0.60, 0.90) | 0.70 (0.55, 0.88) | 0.64 (0.51, 0.80) |  | 0.87 (0.82, 0.93) | <0.001 | |  | |
|  | Multivariable4 | 1 (ref) | 0.96 (0.80, 1.16) | 0.81 (0.66, 1.00) | 0.79 (0.62, 1.01) | 0.77 (0.60, 0.98) |  | 0.92 (0.87, 0.99) | 0.02 | |  | |
|  | **(+)** |  |  |  |  |  |  |  |  | |  | |
|  | Cases, n | 31 | 43 | 42 | 33 | 28 |  | 177 |  | |  | |
|  | Age-adjusted3 | 1 (ref) | 0.99 (0.62, 1.59) | 1.10 (0.68, 1.76) | 1.21 (0.73, 1.99) | 0.85 (0.50, 1.43) |  | 1.00 (0.88, 1.14) | 0.97 | |  | |
|  | Multivariable4 | 1 (ref) | 1.03 (0.64, 1.64) | 1.20 (0.75, 1.92) | 1.38 (0.84, 2.29) | 1.03 (0.61, 1.75) |  | 1.07 (0.93, 1.22) | 0.34 | |  | |
| ***KRAS* mutation** | |  |  |  |  |  |  |  |  | | 0.76 | |
|  | **(-)** |  |  |  |  |  |  |  |  | |  | |
|  | Cases, n | 167 | 191 | 145 | 90 | 103 |  | 696 |  | |  | |
|  | Age-adjusted3 | 1 (ref) | 0.83 (0.67, 1.03) | 0.74 (0.59, 0.93) | 0.68 (0.53, 0.89) | 0.63 (0.49, 0.81) |  | 0.89 (0.83, 0.95) | <0.001 | |  | |
|  | Multivariable4 | 1 (ref) | 0.87 (0.70, 1.08) | 0.82 (0.65, 1.03) | 0.78 (0.60, 1.02) | 0.76 (0.58, 1.00) |  | 0.94 (0.88, 1.02) | 0.13 | |  | |
|  | **(+)** |  |  |  |  |  |  |  |  | |  | |
|  | Cases, n | 73 | 117 | 76 | 54 | 54 |  | 374 |  | |  | |
|  | Age-adjusted3 | 1 (ref) | 1.15 (0.85, 1.54) | 0.89 (0.64, 1.23) | 0.94 (0.66, 1.34) | 0.76 (0.53, 1.09) |  | 0.91 (0.83, 1.00) | 0.05 | |  | |
|  | Multivariable4 | 1 (ref) | 1.18 (0.88, 1.59) | 0.97 (0.70, 1.35) | 1.05 (0.73, 1.51) | 0.90 (0.62, 1.30) |  | 0.96 (0.87, 1.06) | 0.42 | |  | |
| ***PIK3CA* mutation** | |  |  |  |  |  |  |  |  | | 0.77 |
|  | **(-)** |  |  |  |  |  |  |  |  | |  | |
|  | Cases, n | 191 | 241 | 173 | 109 | 130 |  | 844 |  | |  | |
|  | Age-adjusted3 | 1 (ref) | 0.91 (0.75, 1.10) | 0.76 (0.62, 0.94) | 0.71 (0.56, 0.90) | 0.69 (0.55, 0.87) |  | 0.90 (0.85, 0.96) | 0.002 | |  | |
|  | Multivariable4 | 1 (ref) | 0.95 (0.78, 1.15) | 0.84 (0.68, 1.04) | 0.81 (0.63, 1.04) | 0.84 (0.66, 1.07) |  | 0.96 (0.90, 1.03) | 0.26 | |  | |
|  | **(+)** |  |  |  |  |  |  |  |  | |  | |
|  | Cases, n | 27 | 44 | 32 | 28 | 19 |  | 150 |  | |  | |
|  | Age-adjusted3 | 1 (ref) | 1.06 (0.66, 1.73) | 0.94 (0.56, 1.57) | 1.24 (0.73, 2.13) | 0.63 (0.35, 1.14) |  | 0.89 (0.76, 1.03) | 0.11 | |  | |
|  | Multivariable4 | 1 (ref) | 1.11 (0.69, 1.81) | 1.05 (0.62, 1.76) | 1.42 (0.82, 2.43) | 0.76 (0.41, 1.38) |  | 0.94 (0.81, 1.09) | 0.41 | |  | |
| 1 The *P* value for linear trend across calcium intake was from the Wald test on the continuous term of calcium intake.  2 The *P* value for heterogeneity across tumor markers was from the likelihood ratio test comparing the model in which a linear association with calcium intake was allowed to vary by tumor subtypes with the model in which a common association was assumed.  3 Age-adjusted analysis was adjusted for the same set of variables as denoted in Supplemental Table 3.  4 Multivariable analysis was adjusted for the same set of variables as denoted in Supplemental Table 1.  Abbreviations: CIMP, CpG island methylator phenotype; MSI, microsatellite instability; NR, not relevant | | | | | | | | | | | | |

| **Supplemental Table 8. HR and 95% CI of Dietary Calcium Intake and Colorectal Cancer Risk Overall and by Molecular Subtypes** | | | | | | | | | |
| --- | --- | --- | --- | --- | --- | --- | --- | --- | --- |
|  |  | **Dietary calcium intake (mg/day)** | | | | | |  |  |
|  |  | **0-599** | **600-749** | **750-899** | **≥900** |  | **Per 300** | ***P*trend1** | ***P*heterogeneity2** |
| **Overall** | |  |  |  |  |  |  |  | NR |
|  | Cases, n | 752 | 659 | 458 | 472 |  | 2341 |  |  |
|  | Age-adjusted3 | 1 (ref) | 0.92 (0.83,1.02) | 0.88 (0.78,0.99) | 0.75 (0.67,0.84) |  | 0.88 (0.83,0.93) | <0.001 |  |
|  | Multivariable4 | 1 (ref) | 0.97 (0.87,1.08) | 0.96 (0.85,1.08) | 0.84 (0.74,0.95) |  | 0.92 (0.87,0.98) | 0.005 |  |
| **CIMP status** | |  |  |  |  |  |  |  | 0.02 |
|  | **Negative/low** |  |  |  |  |  |  |  |  |
|  | Cases, n | 270 | 221 | 183 | 146 |  | 820 |  |  |
|  | Age-adjusted3 | 1 (ref) | 0.90 (0.75, 1.07) | 1.01 (0.84, 1.22) | 0.66 (0.54, 0.81) |  | 0.84 (0.77, 0.91) | <0.001 |  |
|  | Multivariable4 | 1 (ref) | 0.94 (0.78, 1.13) | 1.10 (0.91, 1.34) | 0.74 (0.60, 0.92) |  | 0.88 (0.80, 0.97) | 0.01 |  |
|  | **High** |  |  |  |  |  |  |  |  |
|  | Cases, n | 51 | 63 | 32 | 48 |  | 194 |  |  |
|  | Age-adjusted3 | 1 (ref) | 1.31 (0.90, 1.89) | 0.91 (0.58, 1.42) | 1.21 (0.81, 1.80) |  | 1.06 (0.89, 1.27) | 0.49 |  |
|  | Multivariable4 | 1 (ref) | 1.38 (0.95, 2.01) | 0.99 (0.64, 1.56) | 1.37 (0.91, 2.05) |  | 1.12 (0.94, 1.34) | 0.21 |  |
| **MSI status** | |  |  |  |  |  |  |  | 0.02 |
|  | **non-MSI-high** |  |  |  |  |  |  |  |  |
|  | Cases, n | 243 | 205 | 160 | 134 |  | 742 |  |  |
|  | Age-adjusted3 | 1 (ref) | 0.97 (0.81, 1.15) | 0.94 (0.78, 1.14) | 0.70 (0.58, 0.85) |  | 0.84 (0.77, 0.92) | <0.001 |  |
|  | Multivariable4 | 1 (ref) | 1.02 (0.85, 1.21) | 1.03 (0.85, 1.26) | 0.79 (0.65, 0.98) |  | 0.89 (0.81, 0.97) | 0.01 |  |
|  | **High** |  |  |  |  |  |  |  |  |
|  | Cases, n | 67 | 76 | 43 | 60 |  | 246 |  |  |
|  | Age-adjusted3 | 1 (ref) | 1.08 (0.73, 1.59) | 1.04 (0.68, 1.59) | 1.17 (0.78, 1.74) |  | 1.07 (0.90, 1.28) | 0.45 |  |
|  | Multivariable4 | 1 (ref) | 1.13 (0.77, 1.67) | 1.13 (0.73, 1.73) | 1.32 (0.88, 1.98) |  | 1.13 (0.94, 1.35) | 0.19 |  |
| ***BRAF* mutation** | |  |  |  |  |  |  |  | 0.06 |
|  | **(-)** |  |  |  |  |  |  |  |  |
|  | Cases, n | 279 | 251 | 188 | 173 |  | 891 |  |  |
|  | Age-adjusted3 | 1 (ref) | 0.96 (0.81, 1.14) | 0.97 (0.80, 1.16) | 0.73 (0.60, 0.88) |  | 0.85 (0.78, 0.93) | <0.001 |  |
|  | Multivariable4 | 1 (ref) | 1.00 (0.84, 1.19) | 1.05 (0.87, 1.28) | 0.82 (0.67, 1.00) |  | 0.90 (0.82, 0.98) | 0.02 |  |
|  | **(+)** |  |  |  |  |  |  |  |  |
|  | Cases, n | 51 | 53 | 32 | 41 |  | 177 |  |  |
|  | Age-adjusted3 | 1 (ref) | 1.12 (0.76, 1.64) | 0.96 (0.61, 1.50) | 1.07 (0.71, 1.62) |  | 1.04 (0.86, 1.25) | 0.68 |  |
|  | Multivariable4 | 1 (ref) | 1.18 (0.80, 1.74) | 1.04 (0.66, 1.62) | 1.21 (0.80, 1.85) |  | 1.10 (0.91, 1.32) | 0.34 |  |
| ***KRAS* mutation** | |  |  |  |  |  |  |  | 0.50 |
|  | **(-)** |  |  |  |  |  |  |  |  |
|  | Cases, n | 228 | 186 | 146 | 136 |  | 696 |  |  |
|  | Age-adjusted3 | 1 (ref) | 0.87 (0.71, 1.06) | 0.93 (0.75, 1.15) | 0.72 (0.58, 0.90) |  | 0.86 (0.78, 0.94) | 0.002 |  |
|  | Multivariable4 | 1 (ref) | 0.92 (0.75, 1.12) | 1.02 (0.82, 1.26) | 0.82 (0.65, 1.02) |  | 0.90 (0.82, 1.00) | 0.05 |  |
|  | **(+)** |  |  |  |  |  |  |  |  |
|  | Cases, n | 104 | 117 | 75 | 78 |  | 374 |  |  |
|  | Age-adjusted3 | 1 (ref) | 1.20 (0.92, 1.56) | 1.04 (0.77, 1.40) | 0.88 (0.65, 1.19) |  | 0.91 (0.80, 1.04) | 0.15 |  |
|  | Multivariable4 | 1 (ref) | 1.24 (0.95, 1.62) | 1.12 (0.83, 1.52) | 0.98 (0.73, 1.33) |  | 0.96 (0.84, 1.09) | 0.49 |  |
| ***PIK3CA* mutation** | |  |  |  |  |  |  |  | 0.19 |
|  | **(-)** |  |  |  |  |  |  |  |  |
|  | Cases, n | 267 | 238 | 182 | 157 |  | 844 |  |  |
|  | Age-adjusted3 | 1 (ref) | 0.95 (0.80, 1.13) | 0.98 (0.81, 1.18) | 0.70 (0.58, 0.86) |  | 0.87 (0.79, 0.94) | 0.001 |  |
|  | Multivariable4 | 1 (ref) | 1.00 (0.83, 1.19) | 1.07 (0.88, 1.30) | 0.80 (0.65, 0.98) |  | 0.91 (0.83, 1.00) | 0.05 |  |
|  | **(+)** |  |  |  |  |  |  |  |  |
|  | Cases, n | 35 | 48 | 24 | 43 |  | 150 |  |  |
|  | Age-adjusted3 | 1 (ref) | 1.35 (0.87, 2.10) | 0.97 (0.57, 1.63) | 1.41 (0.90, 2.22) |  | 0.95 (0.77, 1.19) | 0.68 |  |
|  | Multivariable4 | 1 (ref) | 1.42 (0.91, 2.20) | 1.06 (0.63, 1.80) | 1.59 (1.00, 2.51) |  | 0.99 (0.80, 1.23) | 0.94 |  |
| 1 The *P* value for linear trend across calcium intake was from the Wald test on the continuous term of calcium intake.  2 The *P* value for heterogeneity across tumor markers was from the likelihood ratio test comparing the model in which a linear association with calcium intake was allowed to vary by tumor subtypes with the model in which a common association was assumed.  3 Age-adjusted analysis was adjusted for the same set of variables as denoted in Supplemental Table 3.  4 Multivariable analysis was adjusted for supplemental calcium intake (<200, 200-299, 300-499, ≥500 mg/day) in addition to the same set of variables as denoted in Supplemental Table 1.  Abbreviations: CIMP, CpG island methylator phenotype; MSI, microsatellite instability; NR, not relevant | | | | | | | | | |

| **Supplemental Table 9. HR and 95% CI of Supplemental Calcium Intake and Colorectal Cancer Risk Overall and by Molecular Subtypes** | | | | | | | | | | |
| --- | --- | --- | --- | --- | --- | --- | --- | --- | --- | --- |
|  |  | **Supplemental calcium intake (mg/day)** | | | | | |  |  |
|  |  | **0-199** | **200-299** | **300-499** | **≥500** |  | **Per 300** | ***P*trend1** | ***P*heterogeneity2** |
| **Overall** | |  |  |  |  |  |  |  | NR |
|  | Cases, n | 1808 | 175 | 186 | 172 |  | 2341 |  |  |
|  | Age-adjusted3 | 1 (ref) | 0.90 (0.77,1.05) | 0.76 (0.65,0.89) | 0.74 (0.63,0.86) |  | 0.88 (0.83,0.93) | <0.001 |  |
|  | Multivariable4 | 1 (ref) | 1.00 (0.85,1.17) | 0.88 (0.75,1.03) | 0.88 (0.74,1.03) |  | 0.96 (0.90,1.02) | 0.18 |  |
| **CIMP status** | |  |  |  |  |  |  |  | 0.98 |
|  | **Negative/low** |  |  |  |  |  |  |  |  |
|  | Cases, n | 464 | 42 | 47 | 51 |  | 604 |  |  |
|  | Age-adjusted3 | 1 (ref) | 0.92 (0.70, 1.20) | 0.75 (0.57, 0.99) | 0.78 (0.60, 1.03) |  | 0.92 (0.83, 1.01) | 0.08 |  |
|  | Multivariable4 | 1 (ref) | 1.00 (0.76, 1.32) | 0.85 (0.64, 1.12) | 0.92 (0.70, 1.22) |  | 0.99 (0.89, 1.09) | 0.82 |  |
|  | **High** |  |  |  |  |  |  |  |  |
|  | Cases, n | 137 | 12 | 24 | 16 |  | 189 |  |  |
|  | Age-adjusted3 | 1 (ref) | 0.62 (0.34, 1.13) | 1.03 (0.66, 1.59) | 0.75 (0.45, 1.25) |  | 0.91 (0.75, 1.11) | 0.37 |  |
|  | Multivariable4 | 1 (ref) | 0.67 (0.37, 1.22) | 1.16 (0.75, 1.79) | 0.89 (0.53, 1.49) |  | 0.99 (0.82, 1.20) | 0.92 |  |
| **MSI status** | |  |  |  |  |  |  |  | 0.81 |
|  | **non-MSI-high** |  |  |  |  |  |  |  |  |
|  | Cases, n | 672 | 59 | 68 | 63 |  | 862 |  |  |
|  | Age-adjusted3 | 1 (ref) | 0.89 (0.68, 1.17) | 0.84 (0.65, 1.08) | 0.78 (0.60, 1.02) |  | 0.91 (0.83, 1.01) | 0.07 |  |
|  | Multivariable4 | 1 (ref) | 0.98 (0.74, 1.29) | 0.95 (0.73, 1.23) | 0.93 (0.71, 1.22) |  | 0.99 (0.90, 1.09) | 0.87 |  |
|  | **High** |  |  |  |  |  |  |  |  |
|  | Cases, n | 143 | 11 | 20 | 15 |  | 189 |  |  |
|  | Age-adjusted3 | 1 (ref) | 0.60 (0.32, 1.11) | 0.82 (0.51, 1.33) | 0.67 (0.39, 1.15) |  | 0.88 (0.71, 1.08) | 0.21 |  |
|  | Multivariable4 | 1 (ref) | 0.65 (0.35, 1.21) | 0.95 (0.58, 1.53) | 0.81 (0.47, 1.40) |  | 0.97 (0.79, 1.18) | 0.74 |  |
| ***BRAF* mutation** | |  |  |  |  |  |  |  | 0.19 |
|  | **(-)** |  |  |  |  |  |  |  |  |
|  | Cases, n | 699 | 59 | 73 | 60 |  | 891 |  |  |
|  | Age-adjusted3 | 1 (ref) | 0.72 (0.52, 0.99) | 0.90 (0.69, 1.17) | 0.76 (0.57, 1.01) |  | 0.88 (0.80, 0.97) | 0.01 |  |
|  | Multivariable4 | 1 (ref) | 0.94 (0.71, 1.23) | 0.97 (0.75, 1.25) | 0.84 (0.63, 1.10) |  | 0.95 (0.86, 1.06) | 0.36 |  |
|  | **(+)** |  |  |  |  |  |  |  |  |
|  | Cases, n | 129 | 13 | 17 | 18 |  | 177 |  |  |
|  | Age-adjusted3 | 1 (ref) | 1.07 (0.74, 1.57) | 0.74 (0.49, 1.11) | 0.77 (0.52, 1.15) |  | 1.02 (0.84, 1.24) | 0.88 |  |
|  | Multivariable4 | 1 (ref) | 0.85 (0.47, 1.52) | 0.90 (0.54, 1.51) | 1.10 (0.66, 1.83) |  | 1.10 (0.91, 1.34) | 0.31 |  |
| ***KRAS* mutation** | |  |  |  |  |  |  |  | 0.85 |
|  | **(-)** |  |  |  |  |  |  |  |  |
|  | Cases, n | 540 | 41 | 63 | 52 |  | 696 |  |  |
|  | Age-adjusted3 | 1 (ref) | 0.72 (0.52, 0.99) | 0.90 (0.69, 1.17) | 0.76 (0.57, 1.01) |  | 0.92 (0.82, 1.02) | 0.10 |  |
|  | Multivariable4 | 1 (ref) | 0.79 (0.57, 1.09) | 1.02 (0.78, 1.34) | 0.90 (0.67, 1.21) |  | 0.99 (0.89, 1.11) | 0.92 |  |
|  | **(+)** |  |  |  |  |  |  |  |  |
|  | Cases, n | 289 | 31 | 27 | 27 |  | 374 |  |  |
|  | Age-adjusted3 | 1 (ref) | 1.07 (0.74, 1.57) | 0.74 (0.49, 1.11) | 0.77 (0.52, 1.15) |  | 0.91 (0.78, 1.05) | 0.19 |  |
|  | Multivariable4 | 1 (ref) | 1.19 (0.81, 1.74) | 0.83 (0.55, 1.25) | 0.90 (0.60, 1.36) |  | 0.98 (0.84, 1.13) | 0.75 |  |
| ***PIK3CA* mutation** | |  |  |  |  |  |  |  | 0.07 |
|  | **(-)** |  |  |  |  |  |  |  |  |
|  | Cases, n | 643 | 61 | 71 | 69 |  | 844 |  |  |
|  | Age-adjusted3 | 1 (ref) | 0.90 (0.69, 1.18) | 0.84 (0.65, 1.08) | 0.86 (0.67, 1.11) |  | 0.94 (0.86, 1.04) | 0.23 |  |
|  | Multivariable4 | 1 (ref) | 0.99 (0.76, 1.30) | 0.96 (0.74, 1.24) | 1.02 (0.79, 1.33) |  | 1.03 (0.93, 1.13) | 0.62 |  |
|  | **(+)** |  |  |  |  |  |  |  |  |
|  | Cases, n | 123 | 7 | 15 | 5 |  | 150 |  |  |
|  | Age-adjusted3 | 1 (ref) | 0.54 (0.25, 1.16) | 0.93 (0.53, 1.61) | 0.29 (0.12, 0.71) |  | 0.74 (0.57, 0.96) | 0.02 |  |
|  | Multivariable4 | 1 (ref) | 0.58 (0.27, 1.27) | 1.05 (0.60, 1.83) | 0.34 (0.14, 0.84) |  | 0.81 (0.63, 1.04) | 0.10 |  |
| 1 The *P* value for linear trend across calcium intake was from the Wald test on the continuous term of calcium intake.  2 The *P* value for heterogeneity across tumor markers was from the likelihood ratio test comparing the model in which a linear association with calcium intake was allowed to vary by tumor subtypes with the model in which a common association was assumed.  3 Age-adjusted analysis was adjusted for the same set of variables as denoted in Supplemental Table 3.  4 Multivariable analysis was adjusted for dietary calcium intake (<600, 600-749, 750-899, ≥900 mg/day) in addition to the same set of variables as denoted in Supplemental Table 1.  Abbreviations: CIMP, CpG island methylator phenotype; MSI, microsatellite instability; NR, not relevant | | | | | | | | | | |

| **Supplemental Table 10. Multivariable HR**1 **and 95% CI of Calcium Intake and Colorectal Cancer Risk by the Joint CIMP and MSI status** | | | | | |
| --- | --- | --- | --- | --- | --- |
|  | **CIMP and MSI status** | | | |  |
| **Sources of calcium** | **CIMP-negative/low;**  **non-MSI-high** | **CIMP-negative/low;**  **MSI-high** | **CIMP-high;**  **non-MSI-high** | **CIMP-high;**  **MSI-high** | ***P*heterogeneity2** |
| **Cases, n** | 742 | 42 | 54 | 137 |  |
| **Total calcium** |  |  |  |  |  |
| Per 300 mg/day | 0.94 (0.87, 1.01) | 0.97 (0.74, 1.28) | 1.00 (0.78, 1.27) | 1.05 (0.90, 1.22) | 0.62 |
| *P*trend3 | 0.08 | 0.84 | 0.97 | 0.56 |  |
| **Dietary calcium** |  |  |  |  |  |
| Per 300 mg/day | 0.89 (0.81, 0.98) | 0.86 (0.58, 1.27) | 0.95 (0.67, 1.35) | 1.20 (0.98, 1.48) | 0.08 |
| *P*trend3 | 0.02 | 0.44 | 0.78 | 0.08 |  |
| **Supplemental calcium** |  |  |  |  |  |
| Per 300 mg/day | 0.99 (0.89, 1.10) | 1.09 (0.74, 1.62) | 1.09 (0.78, 1.52) | 0.91 (0.71, 1.17) | 0.81 |
| *P*trend3 | 0.86 | 0.65 | 0.62 | 0.48 |  |
| 1 Multivariable HR was adjusted for the same set of variables as denoted in Supplemental Table 1; additionally, dietary and supplemental calcium intakes were mutually adjusted for.  2 The *P* value for heterogeneity across tumor markers was from the likelihood ratio test comparing the model in which a linear association with calcium intake was allowed to vary by tumor subtypes with the model in which a common association was assumed.  3 The *P* value for linear trend across calcium intake was from the Wald test on the continuous term of calcium intake.  Abbreviations: CIMP, CpG island methylator phenotype; MSI, microsatellite instability | | | | | |

| **Supplemental Table 11. Multivariable**1 **HR and 95% CI for 300mg/day Increment of Calcium Intakes and Colon Cancer Risk Overall and by Molecular Subtypes without Considering the Latency** | | | | | | | | |
| --- | --- | --- | --- | --- | --- | --- | --- | --- |
|  |  | **Subtype** | ***P*trend2** |  | **Subtype** | ***P*trend2** |  | ***P*heterogeneity3** |
| **Overall** | |  |  |  |  |  |  |  |
|  | No. cases | 2358 |  |  |  |  |  |  |
|  | Total calcium | 0.95 (0.92,0.99) | 0.02 |  | NR | NR |  | NR |
|  | Dietary calcium | 0.94 (0.89,0.98) | 0.005 |  | NR | NR |  | NR |
|  | Supplemental calcium | 1.00 (0.94,1.07) | 0.92 |  | NR | NR |  | NR |
| **CIMP status** | | **Negative/low** |  |  | **High** |  |  |  |
|  | No. cases | 764 |  |  | 209 |  |  |  |
|  | Total calcium | 0.98 (0.92, 1.05) | 0.57 |  | 1.05 (0.92, 1.18) | 0.48 |  | 0.37 |
|  | Dietary calcium | 0.93 (0.86, 1.01) | 0.09 |  | 1.04 (0.90, 1.20) | 0.57 |  | 0.18 |
|  | Supplemental calcium | 1.07 (0.97, 1.19) | 0.16 |  | 1.02 (0.79, 1.31) | 0.88 |  | 0.69 |
| **MSI status** | | **non-MSI-high** |  |  | **High** |  |  |  |
|  | No. cases | 804 |  |  | 200 |  |  |  |
|  | Total calcium | 0.97 (0.91, 1.04) | 0.42 |  | 1.01 (0.89, 1.15) | 0.83 |  | 0.58 |
|  | Dietary calcium | 0.93 (0.86, 1.01) | 0.07 |  | 1.00 (0.86, 1.16) | 0.98 |  | 0.38 |
|  | Supplemental calcium | 1.06 (0.96, 1.16) | 0.27 |  | 1.01 (0.78, 1.33) | 0.92 |  | 0.78 |
| ***BRAF* mutation** | | **(-)** |  |  | **(+)** |  |  |  |
|  | No. cases | 823 |  |  | 187 |  |  |  |
|  | Total calcium | 0.97 (0.91, 1.03) | 0.30 |  | 1.02 (0.89, 1.16) | 0.82 |  | 0.51 |
|  | Dietary calcium | 0.93 (0.86, 1.01) | 0.08 |  | 0.99 (0.85, 1.16) | 0.91 |  | 0.49 |
|  | Supplemental calcium | 1.03 (0.93, 1.14) | 0.59 |  | 1.10 (0.84, 1.43) | 0.49 |  | 0.66 |
| ***KRAS* mutation** | | **(-)** |  |  | **(+)** |  |  |  |
|  | No. cases | 647 |  |  | 376 |  |  |  |
|  | Total calcium | 0.98 (0.91, 1.05) | 0.52 |  | 0.98 (0.90, 1.08) | 0.71 |  | 0.90 |
|  | Dietary calcium | 0.95 (0.87, 1.03) | 0.23 |  | 0.94 (0.84, 1.05) | 0.25 |  | 0.85 |
|  | Supplemental calcium | 1.03 (0.91, 1.17) | 0.61 |  | 1.06 (0.93, 1.22) | 0.38 |  | 0.74 |
| ***PIK3CA* mutation** | | **(-)** |  |  | **(+)** |  |  |  |
|  | No. cases | 771 |  |  | 164 |  |  |  |
|  | Total calcium | 0.98 (0.92, 1.05) | 0.54 |  | 1.03 (0.90, 1.17) | 0.67 |  | 0.50 |
|  | Dietary calcium | 0.94 (0.87, 1.02) | 0.12 |  | 1.02 (0.87, 1.20) | 0.78 |  | 0.34 |
|  | Supplemental calcium | 1.06 (0.95, 1.18) | 0.29 |  | 1.04 (0.85, 1.26) | 0.72 |  | 0.84 |
| 1 Multivariable HR was adjust for the same set of variables as denoted in Supplemental Table 1; additionally, dietary and supplemental calcium intakes were mutually adjusted for.  2 The *P* value for linear trend across calcium intake was from the Wald test on the continuous term of calcium intake.  3 The *P* value for heterogeneity across tumor markers was from the likelihood ratio test comparing the model in which a linear association with calcium intake was allowed to vary by tumor subtypes with the model in which a common association was assumed.  Abbreviations: CIMP, CpG island methylator phenotype; MSI, microsatellite instability; NR, not relevant | | | | | | | | |

| **Supplemental Table 12. IPW-adjusted Multivariable** **HR1 and 95% CI for 300mg/day Increment of Calcium Intakes and Colon Cancer Risk Overall and by Molecular Subtypes** | | | | | | | | |
| --- | --- | --- | --- | --- | --- | --- | --- | --- |
|  |  | **Subtype** | ***P*trend2** |  | **Subtype** | ***P*trend2** |  | ***P*heterogeneity3** |
| **CIMP status** | | **Negative/low** |  |  | **High** |  |  |  |
|  | No. cases | 764 |  |  | 209 |  |  |  |
|  | Total calcium | 0.93 (0.85, 1.01) | 0.09 |  | 1.04 (0.92, 1.19) | 0.52 |  | 0.13 |
|  | Dietary calcium | 0.84 (0.76, 0.93) | <0.001 |  | 1.15 (0.96, 1.37) | 0.13 |  | 0.002 |
|  | Supplemental calcium | 1.03 (0.90, 1.17) | 0.70 |  | 0.98 (0.79, 1.21) | 0.84 |  | 0.70 |
| **MSI status** | | **non-MSI-high** |  |  | **High** |  |  |  |
|  | No. cases | 804 |  |  | 200 |  |  |  |
|  | Total calcium | 0.93 (0.86, 1.00) | 0.05 |  | 1.02 (0.89, 1.17) | 0.76 |  | 0.20 |
|  | Dietary calcium | 0.87 (0.79, 0.96) | 0.004 |  | 1.09 (0.90, 1.31) | 0.38 |  | 0.03 |
|  | Supplemental calcium | 0.98 (0.87, 1.11) | 0.80 |  | 0.97 (0.78, 1.22) | 0.81 |  | 0.92 |
| ***BRAF* mutation** | | **(-)** |  |  | **(+)** |  |  |  |
|  | No. cases | 823 |  |  | 187 |  |  |  |
|  | Total calcium | 0.91 (0.84, 0.98) | 0.02 |  | 1.06 (0.92, 1.21) | 0.45 |  | 0.05 |
|  | Dietary calcium | 0.86 (0.78, 0.95) | 0.003 |  | 1.07 (0.89, 1.28) | 0.47 |  | 0.04 |
|  | Supplemental calcium | 0.94 (0.83, 1.06) | 0.32 |  | 1.10 (0.89, 1.37) | 0.37 |  | 0.19 |
| ***KRAS* mutation** | | **(-)** |  |  | **(+)** |  |  |  |
|  | No. cases | 647 |  |  | 376 |  |  |  |
|  | Total calcium | 0.95 (0.88, 1.04) | 0.27 |  | 0.92 (0.82, 1.03) | 0.15 |  | 0.63 |
|  | Dietary calcium | 0.91 (0.82, 1.01) | 0.09 |  | 0.89 (0.77, 1.03) | 0.12 |  | 0.83 |
|  | Supplemental calcium | 1.01 (0.88, 1.15) | 0.94 |  | 0.94 (0.79, 1.13) | 0.51 |  | 0.55 |
| ***PIK3CA* mutation** | | **(-)** |  |  | **(+)** |  |  |  |
|  | No. cases | 771 |  |  | 164 |  |  |  |
|  | Total calcium | 0.95 (0.88, 1.03) | 0.20 |  | 0.92 (0.79, 1.07) | 0.30 |  | 0.74 |
|  | Dietary calcium | 0.90 (0.81, 0.99) | 0.04 |  | 1.02 (0.83, 1.25) | 0.87 |  | 0.27 |
|  | Supplemental calcium | 1.00 (0.89, 1.13) | 0.95 |  | 0.81 (0.62, 1.07) | 0.14 |  | 0.16 |
| 1 Multivariable HR was adjust for the same set of variables as denoted in Supplemental Table 1; additionally, dietary and supplemental calcium intakes were mutually adjusted for.  2 The *P* value for linear trend across calcium intake was from the Wald test on the continuous term of calcium intake.  3 The *P* value for heterogeneity across tumor markers was from the likelihood ratio test comparing the model in which a linear association with calcium intake was allowed to vary by tumor subtypes with the model in which a common association was assumed.  Abbreviations: CIMP, CpG island methylator phenotype; MSI, microsatellite instability | | | | | | | | |
